# Supplementary material for: Carbon Dots with an Emission in the Near Infrared Produced from Organic Dyes in Porous Silica Microsphere Templates
Source: MDPI journal article supplement (doi:10.3390/nano12030543), 2022-02-05
Supplement: s1 [file s1]

# SUPPORTING MATERIAL

## Carbon Dots with an Emission in the Near Infrared Produced from Organic Dyes in Porous Silica Microsphere Templates

Evgeniia A. Stepanidenko <sup>1</sup>, Ivan D. Skurlov <sup>1</sup>, Pavel D. Khavlyuk <sup>2</sup>, Dmitry A. Onishchuk <sup>1</sup>, Aleksandra V. Koroleva <sup>3</sup>, Evgeniy V. Zhizhin <sup>3</sup>, Irina A. Arefina <sup>1</sup>, Dmitry A. Kurdyukov <sup>4</sup>, Daniil A. Eurov <sup>4</sup>, Valery G. Golubev <sup>4</sup>, Alexander V. Baranov <sup>1</sup>, Anatoly V. Fedorov <sup>1</sup>, Elena V. Ushakova <sup>1,\*</sup> and Andrey L. Rogach <sup>5,6</sup>

<sup>1</sup> Center of Information Optical Technologies, ITMO University, Kronverksky pr. 49, 197101 Saint Petersburg, Russia; stepanidenko.e@mail.ru (E.A.S.); ivan.skurlov.23@gmail.com (I.D.S.);

onishchuk.dmitry@gmail.com (D.A.O.); irina-arefina97@mail.ru (I.A.A.); a\_v\_baranov@yahoo.com (A.V.B.); a\_v\_fedorov@inbox.ru (A.V.F.)

<sup>2</sup> Chair of Physical Chemistry, TU Dresden, Zellescher Weg 19, 01069 Dresden, Germany; pavel.khavlyuk@tu-dresden.de

<sup>3</sup> Centre for Physical Methods of Surface Investigation, Saint Petersburg State University, Universitetskaya emb. 7–9, 199034 Saint Petersburg, Russia; dalika@inbox.ru (A.V.K.); evgeny\_liquid@mail.ru (E.V.Z.)

<sup>4</sup> Laboratory of Amorphous Semiconductors, Ioffe Institute, 26 Politekhnikeskaya Str., 194021 Saint Petersburg, Russia; kurd.gvg@mail.ioffe.ru (D.A.K.); edan@mail.ru (D.A.E.); golubev.gvg@mail.ioffe.ru (V.G.G.)

<sup>5</sup> Centre for Functional Photonics (CFP), Department of Materials Science and Engineering, City University of Hong Kong, Hong Kong 999077, China; andrey.rogach@cityu.edu.hk

<sup>6</sup> Shenzhen Research Institute, City University of Hong Kong, Shenzhen 518057, China

\* Correspondence: elena.ushakova@itmo.ru

**Table S1.** Comparison of optical properties of NIR-emissive CDs

| Precursors                                  | Synthesis method (solvent), temperature, and reaction time                                   | Size, nm                       | Absorption peak(s)/range [nm] | PL maximum [nm]                                        | PL QY @ $\lambda_{\text{ex}}$ , % | Ref.      |
|---------------------------------------------|----------------------------------------------------------------------------------------------|--------------------------------|-------------------------------|--------------------------------------------------------|-----------------------------------|-----------|
| O-phenylenediamine, dopamine                | Hydrothermal, 200 °C, 6 h                                                                    | 5.6                            | 223, 280, 615                 | 648 and 685 ( $\lambda_{\text{ex}}$ = 560 nm)          | 34                                | [1]       |
| O-phenylenediamine, urea                    | Hydrothermal, 210 °C, 8 h                                                                    | 2.6                            | 280, 537, 570                 | 600, 650                                               | 20                                | [2]       |
| P-phenylenediamine, NiCl <sub>2</sub>       | Hydrothermal, 160 °C, 6 h                                                                    | 2.9                            | 510                           | 605                                                    | 65                                | [3]       |
| Citric acid, urea                           | Solvothermal ( <sup>1</sup> DMF), 160 °C, 6 h; MW-assisted exfoliation in DMF, 70 °C, 70 min | 4 (diameter), 0.4–2 (height)   | 619, 720                      | 770 ( $\lambda_{\text{ex}}$ = 732 nm)                  | 11@732 nm                         | [4]       |
| Citric acid, urea, ammonium fluoride        | Solvothermal (DMF), 180 °C, 4 h                                                              | 2.6                            | 556, 624, 715, 847            | 658 and 777 (fs-laser, $\lambda_{\text{ex}}$ > 700 nm) | 10@710 nm                         | [5]       |
| Citric acid, 1,4,5,8-tetraminoanthraquinone | Hydrothermal, 180 °C, 2 h                                                                    | 2.45 (diameter), 0.94 (height) | 230, 280, 650                 | 700                                                    | 7–11                              | [6]       |
| PEG800 and CyOH                             | Solvothermal (ethanol), 160 °C, 2 h                                                          | 2.9                            | 783                           | 820                                                    | 6                                 | [7]       |
| Watermelon juice                            | Solvothermal, 190 °C, 3 h                                                                    | 6                              | 400–800                       | 925 ( $\lambda_{\text{ex}}$ = 808 nm)                  | 0.4                               | [8]       |
| IR1061                                      | Template-assisted, 200 °C, 2 h                                                               | 4                              | 350–1050                      | 1080                                                   | 0.2                               | This work |

<sup>1</sup>DMF—dimethylformamide

**Table S2.** Properties of CDs synthesized by template-assisted method using silica microspheres

| <b>Sample precursor</b> | <b>Size, nm</b> | <b>Absorption band, nm</b> | <b>Photoluminescence band, nm</b> | <b>Reference</b> |
|-------------------------|-----------------|----------------------------|-----------------------------------|------------------|
| APTES                   | 3.3             | 250–450                    | 425                               | [9,10]           |
| APTES                   | 3.6             | 250–450                    | 425                               | [11]             |
| Rhodamine 6G            | 3.1 *           | 475–550                    | 510–560                           | [9]              |
| Rhodamine 6G            | 2.2             | 475–550                    | 510–560                           | This work        |

\* pore size of silica microspheres used as a template.



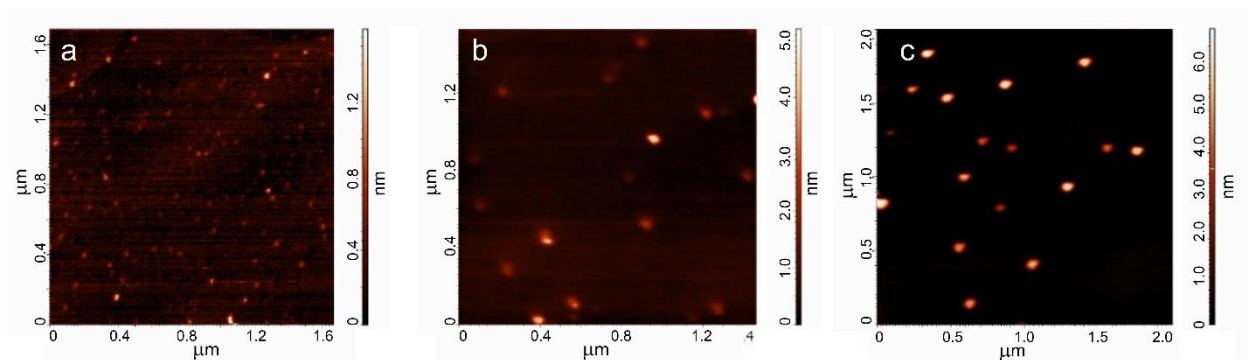

**Figure S4.** AFM images of (a) NIR-CDs-150, (b) NIR-CDs-200, and (c) NIR-CDs-250.

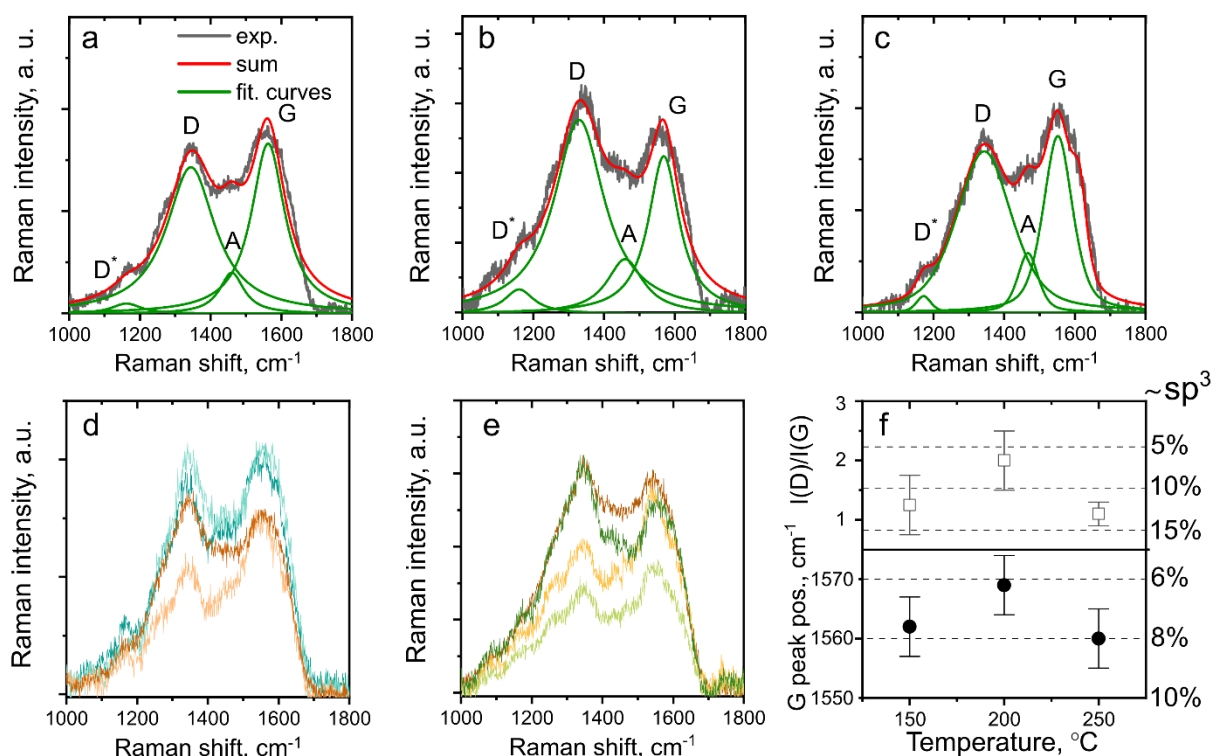

**Figure S5.** Raman spectra of NIR-CDs excited at 633 nm: (a,d) NIR-CDs-150, (b,e) NIR-CDs-200, and (c) NIR-CDs-250. On panels (a–c), experimental data (exp.) are shown in black, deconvoluted peaks corresponding to D\*, D, A, and G bands (fit. curves)—in green, and the overall curves (sum)—in red. Raman spectra shown in panels (d) and (e) illustrate inhomogeneity of NIR-CDs-150 and NIR-CDs-200, respectively. (f) G band peak positions and  $I(D)/I(G)$  values for NIR-CDs samples (NIR-CD-150, NIR-CD-200, NIR-CD-250) versus annealing temperature, and approximate values the of  $sp^3$  content from amorphization trajectories for carbon polymorphs.

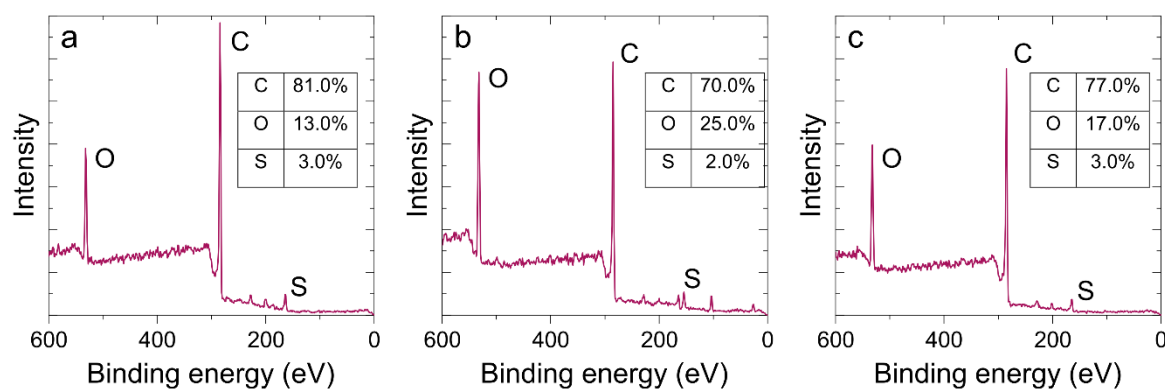

**Figure S6.** XPS survey spectra of (a) NIR-CDs-150, (b) NIR-CDs-200, and (c) NIR-CDs-250. Atomic ratios of constituting elements derived from these spectra are provided as insets.

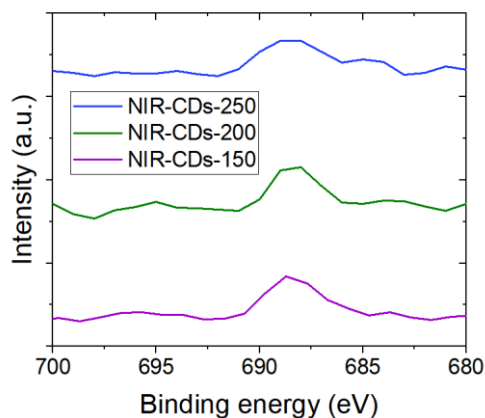

**Figure S7.** XPS survey spectra of fluorine in NIR-CDs-150, NIR-CDs-200, and NIR-CDs-250. Fluorine content is estimated as 2.9, 3.0, and 2.8% for NIR-CDs-150, NIR-CDs-200, and NIR-CDs-250, respectively.

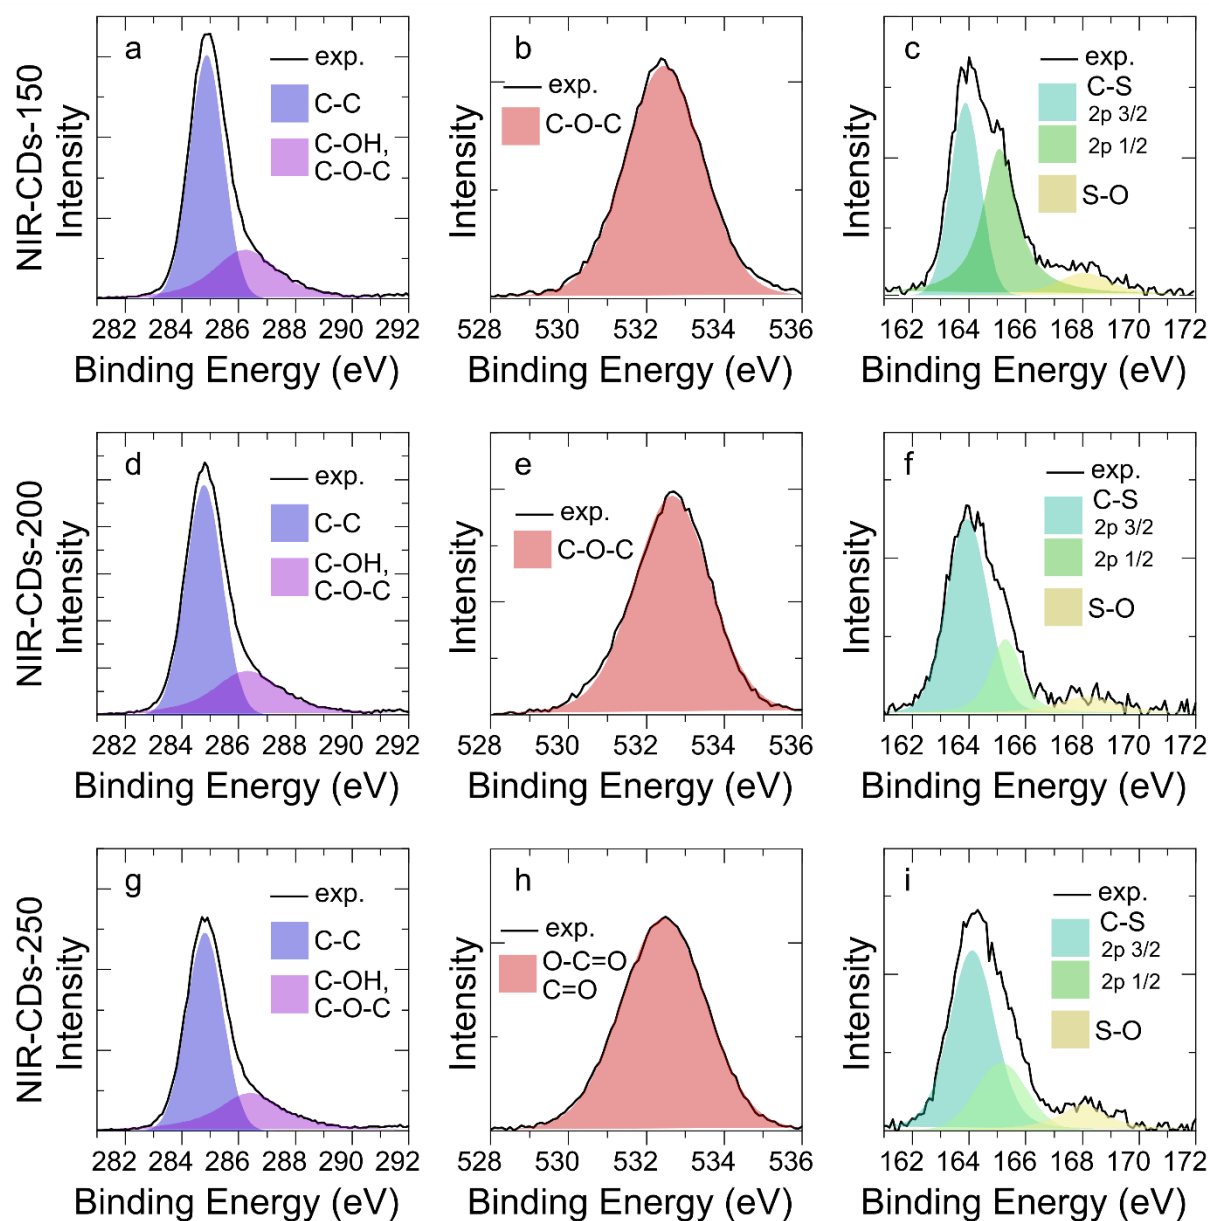

**Figure S8.** High resolution XPS spectra of C1S (a,d,g), O1S (b,e,h), and S2p (c,f,i) of NIR-CDs-150 (a-c), NIR-CDs-200 (d-f), NIR-CDs-250 (g-i).

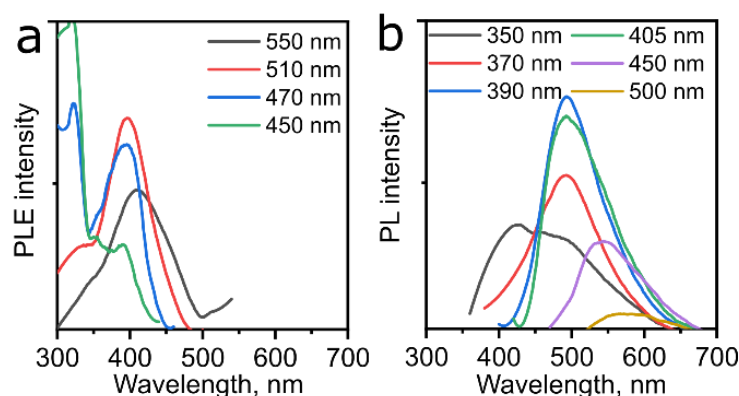

**Figure S9.** (a) PLE and (b) PL spectra of NIR-CDs-200 in acetone. Emission and excitation wavelengths are listed in the legends.

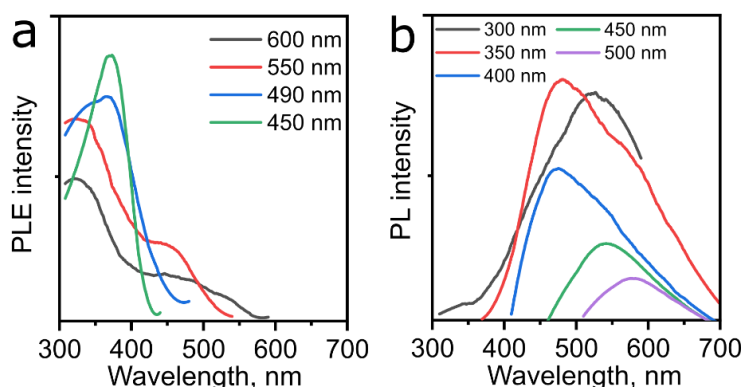

**Figure S10.** (a) PLE and (b) PL spectra of IR1061-200 in chloroform. Emission and excitation wavelengths are listed in the legends.

## References

- 1 Wang, B.; Li, J.; Tang, Z.; Yang, B.; Lu, S. Near-Infrared Emissive Carbon Dots with 33.96% Emission in Aqueous Solution for Cellular Sensing and Light-Emitting Diodes. *Science Bulletin* **2019**, *64*, 1285–1292. <https://doi.org/10.1016/J.SCIB.2019.07.021>.
- 2 Zhu, Z.; Liu, C.; Song, X.M.; Mao, Q.; Ma, T. Carbon Dots as an Indicator of Acid-Base Titration and a Fluorescent Probe for Endoplasm Reticulum Imaging. *ACS Applied Bio Materials* **2021**, *4*, 3623–3629. <https://doi.org/10.1021/acsabm.1c00121>.
- 3 Hua, X.-W.; Bao, Y.-W.; Zeng, J.; Wu, F.-G. Nucleolus-Targeted Red Emissive Carbon Dots with Polarity-Sensitive and Excitation-Independent Fluorescence Emission: High-Resolution Cell Imaging and in Vivo Tracking. *ACS Applied Materials & Interfaces* **2019**, *11*, 32647–32658. <https://doi.org/10.1021/ACSAMI.9B09590>.
- 4 Li, D.; Liang, C.; Ushakova, E. v.; Sun, M.; Huang, X.; Zhang, X.; Jing, P.; Jo Yoo, S.; Kim, J.-G.; Liu, E.; et al. Thermally Activated Upconversion Near-Infrared Photoluminescence from Carbon Dots Synthesized via Microwave Assisted Exfoliation. *Small* **2019**, *15*, 1905050. <https://doi.org/10.1002/SMLL.201905050>.
- 5 Jiang, L.; Ding, H.; Xu, M.; Hu, X.; Li, S.; Zhang, M.; Zhang, Q.; Wang, Q.; Lu, S.; Tian, Y.; et al. UV–Vis–NIR Full-Range Responsive Carbon Dots with Large Multiphoton Absorption Cross Sections and Deep-Red Fluorescence at Nucleoli and In Vivo. *Small* **2020**, *16*, 2000680. <https://doi.org/10.1002/sml.202000680>.
- 6 Li, S.; Su, W.; Wu, H.; Yuan, T.; Yuan, C.; Liu, J.; Deng, G.; Gao, X.; Chen, Z.; Bao, Y.; et al. Targeted Tumour Theranostics in Mice via Carbon Quantum Dots Structurally Mimicking Large Amino Acids. *Nature Biomedical Engineering* **2020**, *4*, 704–716. <https://doi.org/10.1038/s41551-020-0540-y>.



- 7 Zheng, M.; Li, Y.; Liu, S.; Wang, W.; Xie, Z.; Jing, X. One-Pot to Synthesize Multifunctional Carbon Dots for Near Infrared Fluorescence Imaging and Photothermal Cancer Therapy. *ACS Applied Materials and Interfaces* **2016**, *8*, 23533–23541. <https://doi.org/10.1021/acsami.6b07453>.
- 8 Li, Y.; Bai, G.; Zeng, S.; Hao, J. Theranostic Carbon Dots with Innovative NIR-II Emission for in Vivo Renal-Excreted Optical Imaging and Photothermal Therapy. *ACS Applied Materials and Interfaces* **2019**, *11*, 4737–4744. <https://doi.org/10.1021/acsami.8b14877>.
- 9 Eurov, D.A.; Kurdyukov, D.A.; Medvedev, A. v.; Golubev, V.G. Synthesis of Monodisperse Carbon Nanodots with Variable Photoluminescence Spectrum Using Polyaromatic Precursors. *Technical Physics Letters* **2019**, *45*, 940–942. <https://doi.org/10.1134/S1063785019090232>.
- 10 Kurdyukov, D.A.; Eurov, D.A.; Stovpiaga, E.Y.; Kirilenko, D.A.; Konyakhin, S. v.; Shvidchenko, A. v.; Golubev, V.G. Template Synthesis of Monodisperse Carbon Nanodots. *Physics of the Solid State* **2016**, *58*, 2545–2549. <https://doi.org/10.1134/S1063783416120167>.
- 11 Rabchinskii, M.; Mironov, L.; Sgibnev, Y.; Kolesnikov, I.; Kurdyukov, D.; Eurov, D.; Kirilenko, D.; Shvidchenko, A.; Stolyarova, D.; Smirnov, D.; et al. Fluorescence Enhancement of Monodisperse Carbon Nanodots Treated with Aqueous Ammonia and Hydrogen Peroxide. *Nanotechnology* **2019**, *30*, 475601. <https://doi.org/10.1088/1361-6528/ab3cdf>.
